# Supplementary material for: IGF-axis confers transformation and regeneration of fallopian tube fimbria epithelium upon ovulation
Source: PubMed Central journal article supplement — eBioMedicine. 2019 Mar 7;41:597–609. doi: 10.1016/j.ebiom.2019.01.061 (PMC6441876; doi:10.1016/j.ebiom.2019.01.061), 2019-03-07
Supplement: mmc1.pdf [file mmc1.pdf]

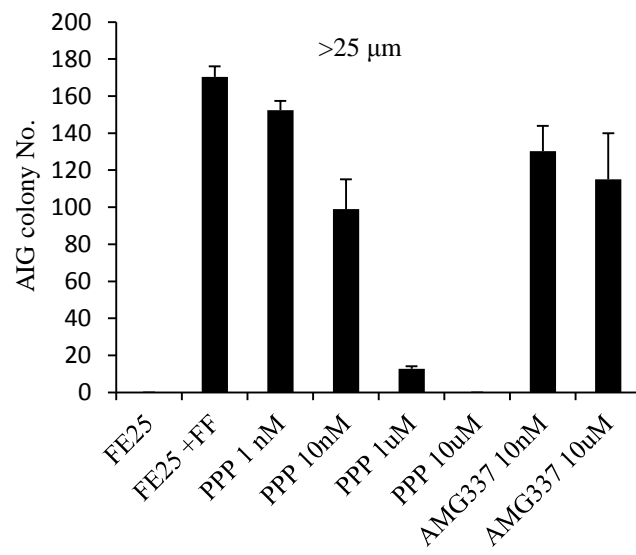

**Supplementary Fig. 1 AIG assay of FE25 cells treated with FF and inhibitors of IGF-1R or cMET.**

As described in Materials and Method, soft agar culture of FE25 cells was added with FF (in a final concentration of 5% in the agar) with or without IGF-1R (PPP) and cMET (AMG337) inhibitors. Colonies of diameter larger than 25  $\mu\text{m}$  were counted.

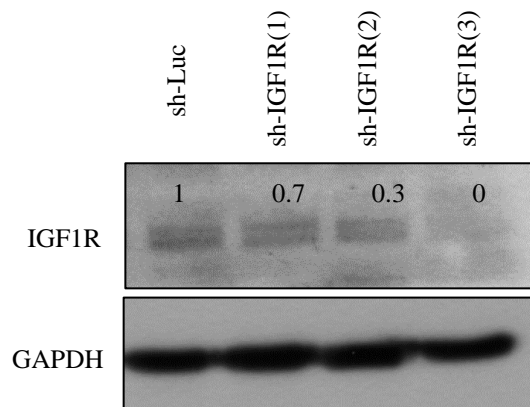

**Supplementary Fig. 2 Expression of IGF-1R protein in FE25 cell clones transduced with sh-RNA.**

Three stable clones of FE25 cells transduced with sh-RNA of IGF-1R were subjected to Western blot analysis of IGF-1R. Relative densities of bands were given.

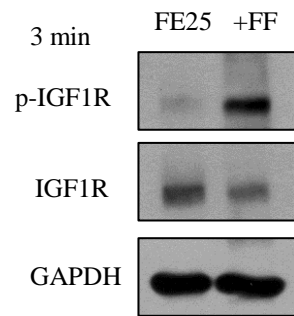

**Supplementary Fig. 3 Rapid autophosphorylation of IGF-1R in FE25 cells 3 min after FF treatment.**

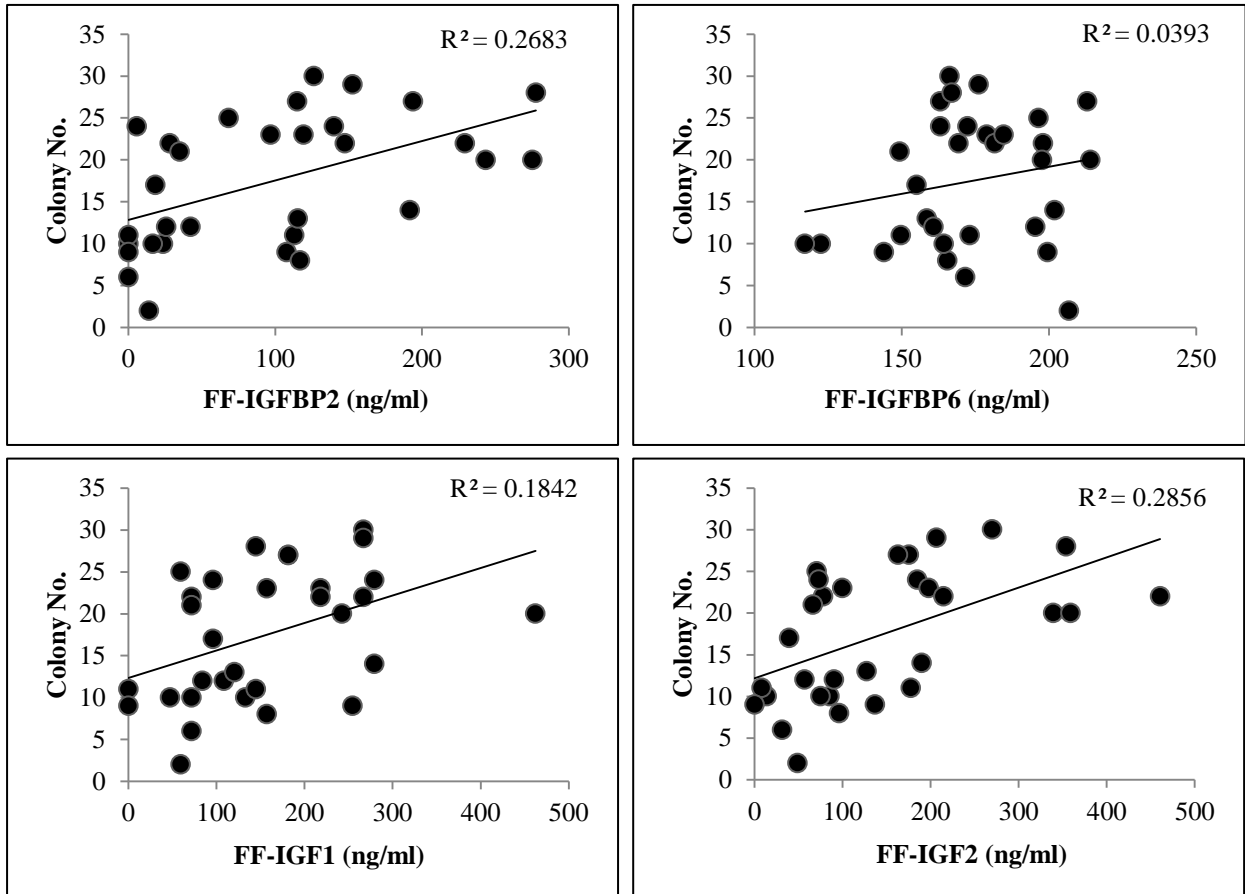

**Supplementary Fig. 4 Correlation between concentration of IGF-AXIS proteins and AIG transformation activity.**

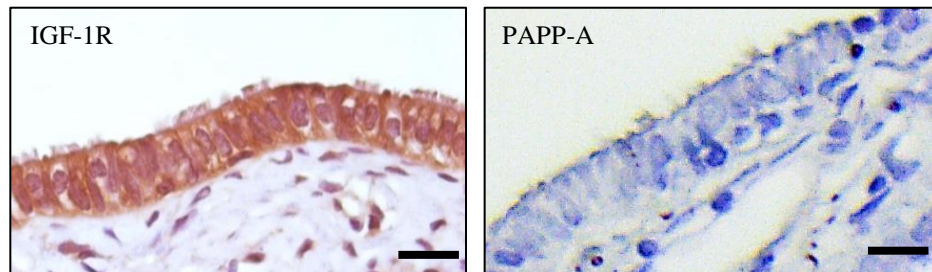

**Supplementary Fig. 5 Fimbrial epithelial cells expressed IGF-1R but not PAPP-A.**  
Representative immunohistochemistry of human fimbrial tissue with antibody against IGF-1R and PAPP-A.

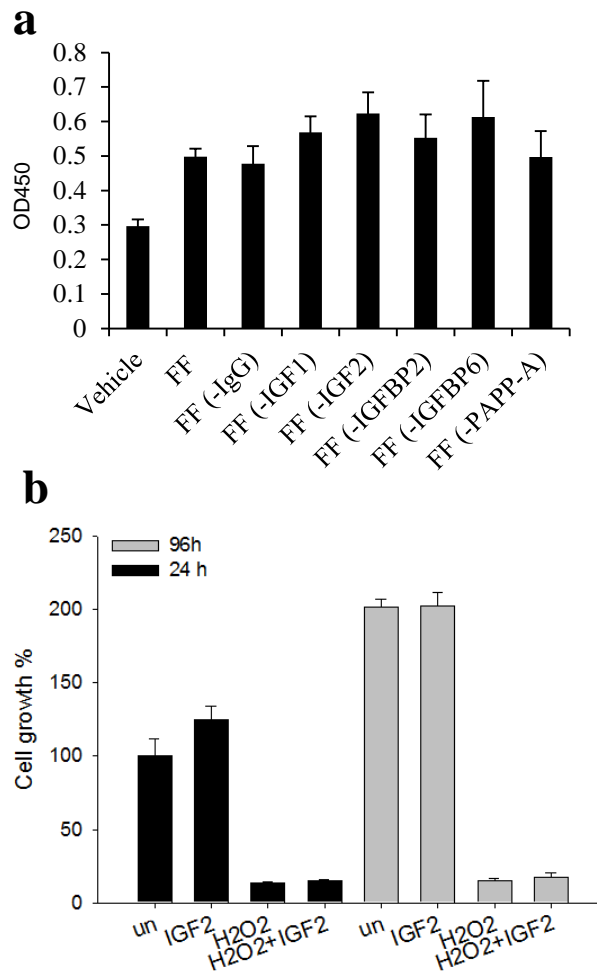

**Supplementary Fig. 6 FF-IGF does not confer proliferation or survival of FE25 cells.** (a) XTT assay of FE25 cells treated with vehicle, 5% FF and 5% FF with depletion of different IGF axis proteins. (b) FE25 cells were cotreated with 500  $\mu$ M H<sub>2</sub>O<sub>2</sub> (H 500), 100 ng/ml IGF2, and cell viability was assayed at 24h and 96 h by XTT.

**a**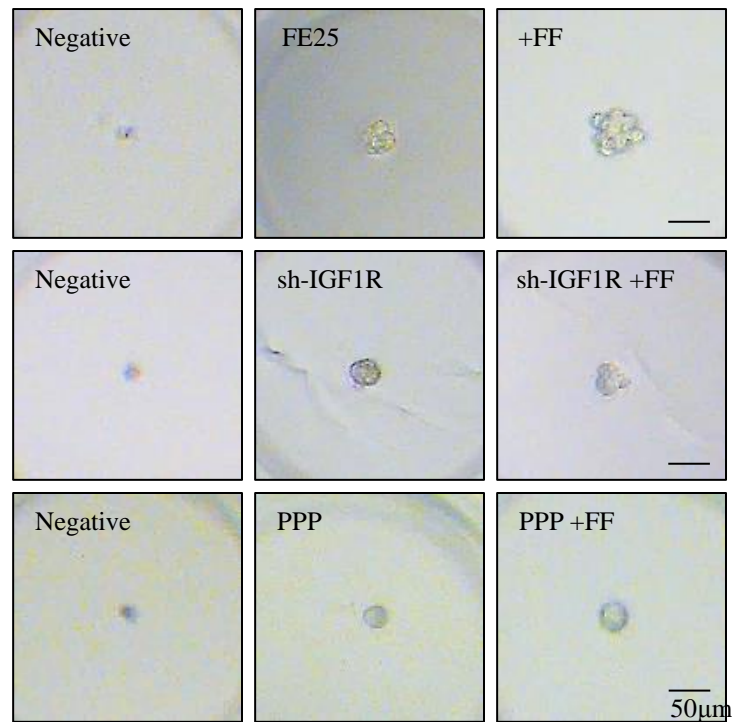**b**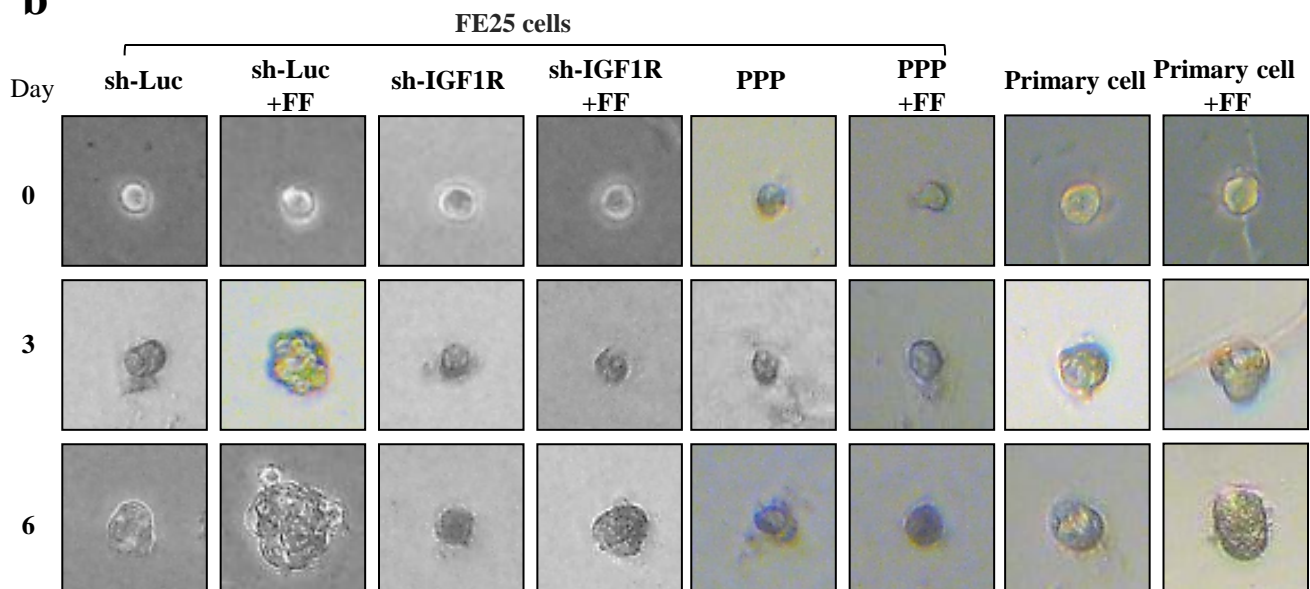

**Supplementary Fig. 7 Representative morphology of 3D colonies of FE25 cells and primary fimbrial epithelial cells cultured with serum replacement on day 10 (a) or 10% FBS on day 6 (b).**

(a) Dead cells showed a morphology of condensation and atrophy. Living colonies with intact IGF-1R showed a loose, clear morphology with expanded cells, whereas those with IGF-1R impairment showed a condense and dark morphology of smaller size, with compacted cells. This phenotype was partially reversed after FF treatment. (b) The same morphological patterns were also found in colonies cultured with regular serum, grew faster and to larger sizes.
